# Supplementary material
Source: PubMed Central journal article supplement (PMC2991501)
Supplement: NIHMS250234-supplement-1_si_001.pdf [file NIHMS250234-supplement-1_si_001.pdf]

# Supporting Information

## **Roles of Conserved Residues of the NuoC region in Proton-translocating NADH-Quinone Oxidoreductase (NDH-1) from *Escherichia coli*<sup>#</sup>.**

**Norma Castro-Guerrero, Prem Kumar Sinha, Jesus Torres-Bacete, Akemi Matsuno-Yagi and Takao Yagi\***

Department of Molecular and Experimental Medicine, The Scripps Research Institute, 10550 North Torrey Pines Road, La Jolla, California 92037

### Contents:

|           |        |
|-----------|--------|
| Table S1  | p. 2   |
| Figure S1 | p. 3-4 |
| Figure S2 | p. 5   |
| Figure S3 | p. 6   |

**Table S1**

Forward oligonucleotides used for the cloning and mutagenesis of *E. coli nuoCD* gene. *Italic* bases represent the restriction site for *Bam*HI (primers A and D) and *Hind* III (primers B, C, E and F). From S104A onwards, the sequence represents the primers used for the introduction of a site-specific mutation. The underlined bases represent mutations. The bold bases mean mutant codons.

|              |                                                                    |
|--------------|--------------------------------------------------------------------|
| <b>A</b>     | 5'-CCG <b>GGATC</b> CTACGCCTGTCCGCCAAGTTTTATCTGG-3'                |
| <b>B</b>     | 5'-GCAGTAAG <b>CTT</b> CGCGAAATAGATTTAGGAATAAGC-3'                 |
| <b>C</b>     | 5'-CGAAG <b>CTT</b> AGGACTTCATGTTCCTCAACCTCGG-3'                   |
| <b>D</b>     | 5'-GTAG <b>GGATC</b> CGATCCCTTTGGTCGCCTCAATCATCTGG-3'              |
| <b>E</b>     | 5'-GGGTCAAAG <b>CTT</b> CAGTGGAACGAAAACCTCAC-3'                    |
| <b>F</b>     | 5'-GGAAGATAAG <b>CTT</b> TCTATTTTCAATAGTTACAAATTG-3'               |
| <b>S104A</b> | 5'-CCGTTTTCTACCATCTGATT <b>GCT</b> ATCGATCGTAACCGCGAC - 3'         |
| <b>A134S</b> | 5'-CACCAAACCTGTTCCCGAACT <b>TCT</b> AACTGGTATGAGCG - 3'            |
| <b>E138A</b> | 5'-CCCGAACGCTAACTGGTAT <b>GCG</b> CGTGAAACCTGGGATCTG - 3'          |
| <b>E138D</b> | 5'-CCCGAACGCTAACTGGTAT <b>GAT</b> CGTGAAACCTGGGATCTG - 3'          |
| <b>E138Q</b> | 5'-CCCGAACGCTAACTGGTAT <b>CAG</b> CGTGAAACCTGGGATCTG - 3'          |
| <b>R139A</b> | 5'-CGCTAACTGGTATGAG <b>GCT</b> GAAACCTGGGATCTGTTTGG - 3'           |
| <b>E140A</b> | 5'-CGCTAACTGGTATGAGCGT <b>GCG</b> ACCTGGGATCTGTTTGGCATTAC - 3'     |
| <b>E140D</b> | 5'-CGCTAACTGGTATGAGCGT <b>GAT</b> ACCTGGGATCTGTTTGGCATTAC - 3'     |
| <b>E140Q</b> | 5'-CGCTAACTGGTATGAGCGT <b>CAA</b> ACCTGGGATCTGTTTGGCATTAC - 3'     |
| <b>D143A</b> | 5'-CTGGTATGAGCGTGAAACCTGG <b>GCT</b> TCTGTTTGGCATTACTTTCGACGG - 3' |
| <b>D143E</b> | 5'-CTGGTATGAGCGTGAAACCTGG <b>GAA</b> ACTGTTTGGCATTACTTTCGACGG - 3' |
| <b>D143N</b> | 5'-CTGGTATGAGCGTGAAACCTGG <b>AAT</b> TCTGTTTGGCATTACTTTCGACGG - 3' |
| <b>G146A</b> | 5'-CGTGAAACCTGGGATCTGTTT <b>GCC</b> ATTACTTTCGACGGTCACC - 3'       |
| <b>F149A</b> | 5'-GGATCTGTTTGGCATTACT <b>GCC</b> GACGGTCACCCGAACCTGCG - 3'        |
| <b>R156A</b> | 5'-GTCACCCGAACCTG <b>GCG</b> CGCATCATGATGCCGC - 3'                 |
| <b>G166A</b> | 5'-GCCGCAAACCTGGAAAG <b>CT</b> CACCCGCTGCGTAAAGATTATCC - 3'        |
| <b>H167A</b> | 5'-GCCGCAAACCTGGAAAGGT <b>GCC</b> CCGCTGCGTAAAGATTATCC - 3'        |
| <b>P168A</b> | 5'-GCCGCAAACCTGGAAAGGTCAC <b>GCG</b> CTGCGTAAAGATTATCC - 3'        |
| <b>K171A</b> | 5'-GAAAGGTCACCCGCTGCGT <b>GCG</b> GATTATCCGGCGCGCGC - 3'           |
| <b>K171R</b> | 5'-GAAAGGTCACCCGCTGCGT <b>GCG</b> GATTATCCGGCGCGCGC - 3'           |
| <b>P182A</b> | 5'-GCGCGCGCTACCGAATTCTCG <b>GCG</b> TTTGAGCTGACCAAAGCC - 3'        |

|                                                                                      |                                                                  |           |
|--------------------------------------------------------------------------------------|------------------------------------------------------------------|-----------|
| NuoCD_Eco                                                                            | MVNNMTDLTAQEPAWQTRDHLDD-----                                     | 23        |
| Nqo5_Tth                                                                             | -----                                                            |           |
| NuoCD_Rsp                                                                            | -----MSLDQAIP-----                                               | 8         |
| Nqo5_Pde                                                                             | -----MSEALSDEALLE-----                                           | 12        |
| NUGM_Yli                                                                             | -----MLSRFARIGSMG--IRPVAAARAT--FVTSARAAQAAPSWENIKD               | 41        |
| 30kDa_Ncr                                                                            | -----MASKLCRSRALASALRSKPSPAIRCLATTSRNLINMEGPNPRQ                 | 45        |
| 30kDa_Hsa                                                                            | -----MAAAVARLWWRGILGASALTRGTGRPSVLLLLPVRRESAGADTRPTVRP           | 49        |
| SU-9_Aca                                                                             | -----MDNQFIFK-                                                   | 8         |
| SU-9_NTa                                                                             | -----MDNQFIFK-                                                   | 8         |
|                                                                                      |                                                                  |           |
| NuoCD_Eco                                                                            | -----PVIGELRNRFPGPDAFTVQATRTGVPV                                 | 49        |
| Nqo5_Tth                                                                             | -----MRLERVLEEERAKGYPIEDNGLGNLW                                  | 26        |
| NuoCD_Rsp                                                                            | -----EALQALRTRFGAAVRAEQATGEAFPV                                  | 34        |
| Nqo5_Pde                                                                             | -----LAEHIAVRRENDVIS-TQAVGELT                                    | 35        |
| NUGM_Yli                                                                             | IRLDPKVHVDEVYEPVNPADRYLQHVSDLHQYAKYIMAALP-KYIQQFSVWKDELTT--      | 97        |
| 30kDa_Ncr                                                                            | FPREP--LPGALNAAVNPADKYQSKADNLHKYGSWLMGCLP-KYIQQFSVWKDELTT--      | 99        |
| 30kDa_Hsa                                                                            | RNDVA-----HKQLSAFGEYVAEILP-KYVQQVQV--SCFNELE                     | 85        |
| SU-9_Aca                                                                             | -----YSWETLPKKWVKKMER--SEHGNS                                    | 31        |
| SU-9_NTa                                                                             | -----YSWETLPKKWVKKMER--SEHGNS                                    | 31        |
|                                                                                      |                                                                  |           |
| NuoCD_Eco                                                                            | VWIKREQLLEVGDFL-KKLPKPYVMLFDLHGMDERLRTHREGLPAADFSVFYHLISID--     | 106       |
| Nqo5_Tth                                                                             | VVLPRERFKEEMAHYKAMGFNFLADIVGLDYLTYDPDRPE-----RFAVVYELVSLPGW      | 80        |
| NuoCD_Rsp                                                                            | LWLDASVWEAAHRFLREEIAAPFPLADLWAIDESLRQHRTGQPASRITLCSHLVSLV--      | 92        |
| Nqo5_Pde                                                                             | VNATLSGVIGLIEFLRNDPNCRFSTLIDITAVDNPAPPA-----RFDVVYHLLSMY--       | 86        |
| NUGM_Yli                                                                             | LHVAPSAVIPVTTFLRDNTSTQYKSIIDITAVDYPSREN-----RFEVVYNFLSVR--       | 148       |
| 30kDa_Ncr                                                                            | IYISPAGVIPVFSFLKYNTAAEYTVQVSDITAVDFPTKDQ-----RFEVVYNLLSVR--      | 150       |
| 30kDa_Hsa                                                                            | VCIHDPGVI PVLTFRLDHTNAQFKSLVDLTAVDVPTRQN-----RFEIVYNLLSLR--      | 136       |
| SU-9_Aca                                                                             | D-TNTDYLFQLLCFLKLHTYTRVQVSDICGVDHPSRKR-----RFEVVYNLLSTR--        | 81        |
| SU-9_NTa                                                                             | D-TNTDYLFQLLCFLKLHTYTRVQVSDICGVDYPSRQK-----RFEVVYNLLSIR--        | 81        |
|                                                                                      |                                                                  |           |
|  |                                                                  |           |
| NuoCD_Eco                                                                            | ---RNRDIMLKVALAENDLHVPTFTKLFNPANWYERETWDLFGITFDGHPNLRRIMMPQT     | 163       |
| Nqo5_Tth                                                                             | KDGDGSRFFVRVYVPEEDPRLPTVTDLWGSANFLEREVYDLFGIVFEGHPDLRKILTPED     | 140       |
| NuoCD_Rsp                                                                            | ---RNADRLKLATDG---RAPSIAGVYANADWYEREAHDMFGLDFG--RETRRILMPPT      | 144       |
| Nqo5_Pde                                                                             | ---QNQRIRVKVQVREDE-LVPSLIGVFPGANWYEREVFDLFGILFSGHSDLRRILTDYG     | 142       |
| NUGM_Yli                                                                             | ---HNSRIRLKTYATEVT-PVPSITCLYEGANWFEREAYDMYGVFFEGHPDLRRIMTDYG     | 204       |
| 30kDa_Ncr                                                                            | ---HNSRIRVKTYADEVS-PVPSITPLYDGANWYEREVYDLFGVFFTGHPDLRRIMTDYG     | 206       |
| 30kDa_Hsa                                                                            | ---FNSRIRVKTYTDELTP-PIESAVSVFKAANWYEREIWDMFVGFANHPDLRRILTDYG     | 192       |
| SU-9_Aca                                                                             | ---YNSRIRVQTSADDEVTR-RI SPVVSFLFPSAGRWEREVWDMFGVSPINHPDLRRISTDYG | 137       |
| SU-9_NTa                                                                             | ---YNSRIRVQTSADDEVTR-RI SPVVSFLFPSAGRWEREVWDMFGVSSINHPDLRRISTDYG | 137       |
|                                                                                      |                                                                  |           |
| NuoCD_Eco                                                                            | WKGHPLRKDYPAR-----ATEFSPFELTKAKQDLE                              | 193 → 600 |
| Nqo5_Tth                                                                             | LEGHPLRKDYPLGETPTLFRE----GRYIIPAEFRAALTGKD                       | 178 → 207 |
| NuoCD_Rsp                                                                            | WEGHPLLKTHYAR-----ATEKPPFVLTDRLFEEAE                             | 174 → 210 |
| Nqo5_Pde                                                                             | FRGHPLRKDFPTTG YVEVRWSDIEKRVVYEPVNLVQEYRQFD                      | 184 → 207 |
| NUGM_Yli                                                                             | FEGHPLRKDFPLTGYTEVRWDEEKRRVYEPLELTQAFRNFS                        | 246 → 281 |
| 30kDa_Ncr                                                                            | FDGHPLRKDFPMTGYTEIRYDEEKKRIVTEPLEMTQAFRNFE                       | 248 → 283 |
| 30kDa_Hsa                                                                            | FEGHPRKDFPLSGYVELRYDDEVKRVVAEPVELAQEFKRFD                        | 234 → 264 |
| SU-9_Aca                                                                             | FEGHPLRKDLPLSGYVQVRYDDPEKRVVSEPIEMTQEFRYFD                       | 179 → 190 |
| SU-9_NTa                                                                             | FEGHPLRKDLPLSGYVEVRYDDPEKRVVSEPIEMTQEFRYFD                       | 179 → 190 |

**Figure S1:** Sequence alignment of the NuoC segment of *E. coli* NDH-1 with its homologues from other organisms. NuoCD\_Eco, *E. coli* NuoCD (NP\_416789); Nqo5\_Tth, *T. thermophilus* Nqo5 (YP\_005887.1); NuoCD\_Rsp, *R. sphaeroides* NuoC (YP\_3531178.1); Nqo5\_Pde, *Paracoccus denitrificans* Nqo5 (YP\_916036.1); NUGM\_Yli, *Yarrowia lipolytica* NUGM (XP\_504891.1);

30kDa\_Ncr, *Neurospora crassa* 30kDa (XM\_952596.2); 30kDa\_Hsa, *Homo sapiens* 30kDa (NP\_004542.1); SU-9\_Aca, *Acanthamoeba castellanii* SU-9 (NP\_042560.1); SU-9\_Nta, *Nicotiana tabacum* SU-9 (YP\_173479.1). Conserved residues are shown in red. Arrow shows the sequence of a conserved  $\alpha$ -helix in the interface of the NuoC and NuoD segments. The NuoD segment sequence of NuoCD is not shown in the alignment.

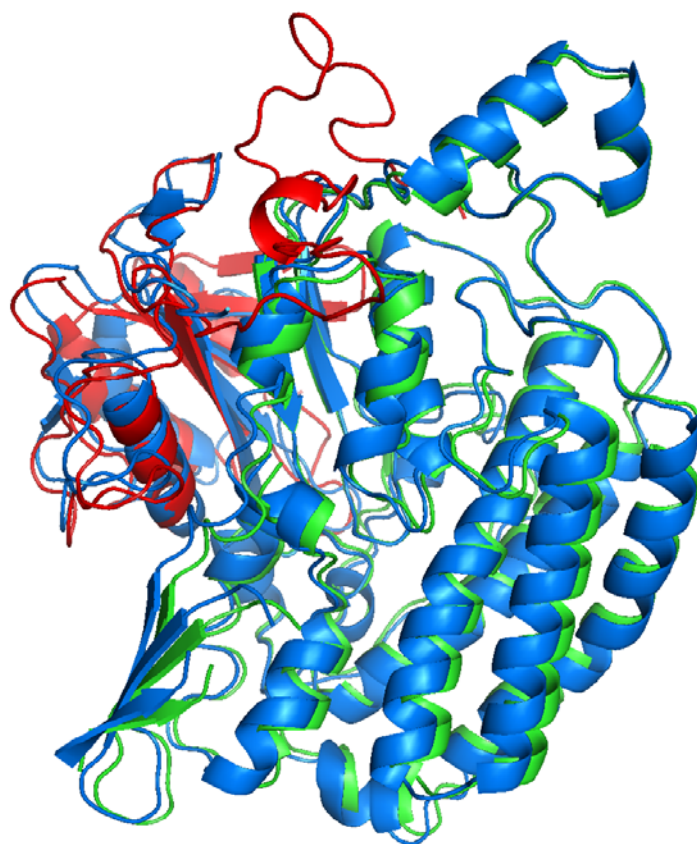

**Figure S2:** A cartoon representation of the 3-D model of the NuoCD subunit of *E. coli* NDH-1 obtained by homology modeling based on the crystallographic data of the *T. thermophilus* enzyme as detailed in Experimental Procedures. The NuoCD subunit of *E. coli* (blue) was superimposed with subunits Nqo4 (green) and Nqo5 (red) of *T. thermophilus* NDH-1.

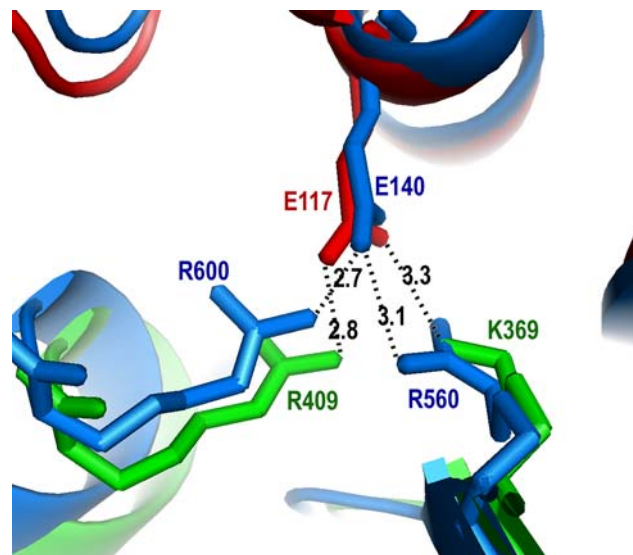

**Figure S3:** Visualization of the NuoC-NuoD interface in the NuoCD subunit of *E. coli* NDH-1 (blue) showing possible ionic interactions between residues Glu-140 and Arg-560 (3.1 Å) or Glu-140 and Arg-600 (2.7 Å). The *E. coli* structure is superimposed with Nqo4 (green) and Nqo5 (red) of the *T. thermophilus* structure. The corresponding ionic pairs are between Glu-117 and Lys-369 (3.3 Å) or Glu-117 and Arg-409 (2.8 Å). Distance measurements were carried out using the measurement tool available from the Pymol software as described in Experimental Procedures.
